# Supplementary material for: Spatial distribution of microbial communities among colonies and genotypes in nursery-reared Acropora cervicornis
Source: PeerJ. 2020 Aug 26;8:e9635. doi: 10.7717/peerj.9635 (PMC7456258; doi:10.7717/peerj.9635)
Supplement: Supplemental Information 1 [file peerj-08-9635-s001.xlsx]

## Sheet: dada_read_stats.txt
Sample	Genotype	Colony	Branch Type	Raw Reads	Quality-filtered Reads	Genbank Accession Number
D1P1	R	R1	Basal	73986	60648	SAMN10223924
D1P2	R	R1	Basal	49001	40885	SAMN10223925
D1P3	R	R1	Basal	193311	150815	SAMN10223926
D1S1	R	R1	Intermediate	86523	77950	SAMN10223927
D1S2	R	R1	Intermediate	117998	100807	SAMN10223928
D1S3	R	R1	Intermediate	69263	60740	SAMN10223929
D1T1	R	R1	Tip	124303	113443	SAMN10223930
D1T2	R	R1	Tip	61032	57019	SAMN10223931
D1T3	R	R1	Tip	99645	86360	SAMN10223932
D2P1	R	R2	Basal	54286	48387	SAMN10223933
D2P2	R	R2	Basal	639756	134216	SAMN10223934
D2P3	R	R2	Basal	104798	96931	SAMN10223935
D2S1	R	R2	Intermediate	138920	127260	SAMN10223936
D2S2	R	R2	Intermediate	867533	163424	SAMN10223937
D2S3	R	R2	Intermediate	79903	71759	SAMN10223938
D2T1	R	R2	Tip	83098	73092	SAMN10223939
D2T2	R	R2	Tip	92506	82747	SAMN10223940
D2T3	R	R2	Tip	91109	86681	SAMN10223941
D3P1	R	R3	Basal	90083	79459	SAMN10223942
D3P2	R	R3	Basal	515	432	SAMN10223943
D3P3	R	R3	Basal	90211	86235	SAMN10223944
D3S1	R	R3	Intermediate	117196	104376	SAMN10223945
D3S2	R	R3	Intermediate	54436	48392	SAMN10223946
D3S3	R	R3	Intermediate	123365	111385	SAMN10223947
D3T1	R	R3	Tip	83439	72100	SAMN10223948
D3T2	R	R3	Tip	39081	35072	SAMN10223949
D3T3	R	R3	Tip	2328	1771	SAMN10223950
G1P1	G	G1	Basal	90429	74268	SAMN10223951
G1P2	G	G1	Basal	132303	118093	SAMN10223952
G1P3	G	G1	Basal	17852	15248	SAMN10223953
G1S1	G	G1	Intermediate	82988	72664	SAMN10223954
G1S2	G	G1	Intermediate	137161	124565	SAMN10223955
G1S3	G	G1	Intermediate	87891	79483	SAMN10223956
G1T1	G	G1	Tip	37137	30667	SAMN10223957
G1T2	G	G1	Tip	36177	30188	SAMN10223958
G1T3	G	G1	Tip	85883	78050	SAMN10223959
G2P1	G	G2	Basal	66381	58537	SAMN10223960
G2P2	G	G2	Basal	43042	37056	SAMN10223961
G2P3	G	G2	Basal	56613	49988	SAMN10223962
G2S1	G	G2	Intermediate	86096	77313	SAMN10223963
G2S2	G	G2	Intermediate	169718	154031	SAMN10223964
G2S3	G	G2	Intermediate	132129	121672	SAMN10223965
G2T1	G	G2	Tip	112005	97378	SAMN10223966
G2T2	G	G2	Tip	61280	54224	SAMN10223967
G2T3	G	G2	Tip	78088	69158	SAMN10223968
G3P1	G	G3	Basal	104874	91272	SAMN10223969
G3P2	G	G3	Basal	162314	136970	SAMN10223970
G3P3	G	G3	Basal	140081	120367	SAMN10223971
G3S1	G	G3	Intermediate	95327	76044	SAMN10223972
G3S2	G	G3	Intermediate	138680	111256	SAMN10223973
G3S3	G	G3	Intermediate	99893	81143	SAMN10223974
G3T1	G	G3	Tip	74140	59140	SAMN10223975
G3T2	G	G3	Tip	84547	75335	SAMN10223976
G3T3	G	G3	Tip	158461	143065	SAMN10223977
Y1P1	Y	Y1	Basal	117360	106800	SAMN10223978
Y1P2	Y	Y1	Basal	99717	89901	SAMN10223979
Y1P3	Y	Y1	Basal	27958	26578	SAMN10223980
Y1S1	Y	Y1	Intermediate	205655	184540	SAMN10223981
Y1S2	Y	Y1	Intermediate	123190	111690	SAMN10223982
Y1S3	Y	Y1	Intermediate	147662	133489	SAMN10223983
Y1T1	Y	Y1	Tip	644868	131889	SAMN10223984
Y1T2	Y	Y1	Tip	687608	141274	SAMN10223985
Y1T3	Y	Y1	Tip	95825	87341	SAMN10223986
Y2P1	Y	Y2	Basal	161011	141818	SAMN10223987
Y2P2	Y	Y2	Basal	5128	4419	SAMN10223988
Y2P3	Y	Y2	Basal	100005	91878	SAMN10223989
Y2S1	Y	Y2	Intermediate	40680	31585	SAMN10223990
Y2S2	Y	Y2	Intermediate	101129	82743	SAMN10223991
Y2S3	Y	Y2	Intermediate	41521	34981	SAMN10223992
Y2T1	Y	Y2	Tip	54937	47947	SAMN10223993
Y2T2	Y	Y2	Tip	63528	49588	SAMN10223994
Y2T3	Y	Y2	Tip	38005	31945	SAMN10223995
Y3P1	Y	Y3	Basal	20019	16514	SAMN10223996
Y3P2	Y	Y3	Basal	45497	35497	SAMN10223997
Y3P3	Y	Y3	Basal	23540	18081	SAMN10223998
Y3S1	Y	Y3	Intermediate	22577	17622	SAMN10223999
Y3S2	Y	Y3	Intermediate	19792	15592	SAMN10224000
Y3S3	Y	Y3	Intermediate	54404	45305	SAMN10224001
Y3T1	Y	Y3	Tip	75530	57929	SAMN10224002
Y3T2	Y	Y3	Tip	65237	47556	SAMN10224003
Y3T3	Y	Y3	Tip	132103	117674	SAMN10224004
